# Supplementary material
Source: publisher figshare collection journal article supplement (https://karger.figshare.com/ndownloader/files/30845731)
Supplement: Supplementary file 1 [file 30845731]

**Table S1： VAF and BM blast of AML patients with the *KMT2A-MLLT10* fusion**

| Variables | No.1 | No.2 | No.4 | No.5 | No.6 | No.7 | No.8 | No.9 | No.10 |
| --- | --- | --- | --- | --- | --- | --- | --- | --- | --- |
| NRAS(VAF%) | 24.1% | 38.4% |  |  | 43.3% |  |  | 42.2% | 39.9% |
| KRAS(VAF%) |  | 8% |  |  |  |  |  |  |  |
| PTPN11(VAF%) |  |  |  |  | 12.9% |  |  |  | 48.9% |
| WT1(VAF%) |  |  |  | 20% |  |  |  |  | 17% |
| ASXL1(VAF%) |  |  | 30.19% |  |  |  |  |  |  |
| CSF3R(VAF%) |  | 20.2% |  |  |  |  |  |  |  |
| TET2(VAF%) |  |  | 38.7% |  |  |  | 24.9% |  |  |
| GATA2(VAF%) |  |  |  |  |  | 35.4% |  | 35.4% |  |
| SETBP1(VAF%) |  |  |  |  |  | 30.1% |  |  |  |
| FLT3(VAF%) |  |  |  |  |  |  | 6.4% | 16.5% |  |
| SF3B1(VAF%) |  |  |  |  |  |  | 18.5% |  |  |
| SETD2(VAF%) |  | 48.5% |  |  |  |  |  |  |  |
| BM blast (%) | 73% | 89.5% | 79.5% | 88% | 77.9% | 86.5% | 70% | 90% | 86% |

Abbreviations: VAF, variant allele frequency; BM, bone marrow.
